# Supplementary material
Source: publisher figshare collection journal article supplement (https://sage.figshare.com/ndownloader/files/13013285)

**A Prospective, Controlled, Multicenter Study to Evaluate the Clinical Outcome of Implant Treatment in Women with Osteoporosis/Osteopenia: 5-Year Results**

A. Temmerman, L. Rasmusson, A. Kübler, A. Thor, J. Merheb, and M. Quirynen

**Appendix**

Appendix Table 1: Type of Prosthetic Restorations

| No. of subjects with                  | Osteoporosis/Osteopenia | Control | Total |
|---------------------------------------|-------------------------|---------|-------|
| Fixed restoration                     | 16                      | 19      | 35    |
| <i>screw-retained bridge, 1 unit</i>  | 12                      | 15      | 27    |
| <i>screw-retained bridge, 2 units</i> | 4                       | 4       | 8     |
| Removable overdenture (bar)           | 3                       | 9       | 12    |
| Grand total                           | 19                      | 28      | 47    |

47 subjects received prosthetic restorations in the study (1 subject died before abutment surgery).

Appendix Table 2: Number of completed visits and number of examined implants.

|                         | Visit 3<br>(IP) | Visit 4<br>(Post-op) | Visit 5<br>(Abut) | Visit 6<br>(Impr) | Visit 7<br>(LD) | Visit 8<br>(LD+6m) | Visit 9<br>(LD+1yr) | Visit 10<br>(LD+2 yrs) | Visit 11<br>(LD+3yrs) | Visit 12<br>(LD+4 yrs) | Visit 13<br>(LD+5 yrs) |
|-------------------------|-----------------|----------------------|-------------------|-------------------|-----------------|--------------------|---------------------|------------------------|-----------------------|------------------------|------------------------|
| <b>Total Visits</b>     | 48              | 48                   | 47                | 47                | 47              | 45                 | 43                  | 45                     | 39                    | 34                     | 37                     |
| <b>Group O Visits</b>   | 20              | 20                   | 19 <sup>1</sup>   | 19                | 19              | 18 <sup>2</sup>    | 16 <sup>3</sup>     | 17 <sup>4</sup>        | 14 <sup>5</sup>       | 10 <sup>6</sup>        | 11                     |
| <b>Group C Visits</b>   | 28              | 28                   | 28                | 28                | 28              | 27 <sup>7</sup>    | 27                  | 28                     | 25 <sup>8</sup>       | 24 <sup>9</sup>        | 26 <sup>10</sup>       |
| <b>Total Implants</b>   | 148             | 148                  | 146               | 146               | 145             | 141                | 136                 | 138                    | 124                   | 106                    | 117                    |
| <b>Group O Implants</b> | 63              | 63                   | 61                | 61                | 60              | 58                 | 53                  | 53                     | 45                    | 34                     | 38                     |
| <b>Group C Implants</b> | 85              | 85                   | 85                | 85                | 85              | 83                 | 83                  | 85                     | 79                    | 72                     | 79                     |

<sup>1</sup> Subject 2002 (O) (2 implants) died of unknown reason after Visit 5.

<sup>2</sup> Subject 2004 (O) (2 implants) did not come to Visits 8 & 9 but completed Visit 10 to Visit 13.

<sup>3</sup> Subject 2013 (O) (3 implants) died of unknown reason after Visit 8.

Subject 2018 (O) (2 implants) did not come to Visits 9 but completed Visit 10 to Visit 13.

<sup>4</sup> Subject 1010 (O) (4 implants) was withdrawn at Visit 9 due to AE (pain).

<sup>5</sup> Subject 2007 (O) (2 implants) died of unknown reason after Visit 10.

Subject 4015 (O) (4 implants) lost to follow-up after Visit 10.

Subject 4023 (O) (2 implants) withdrawn after Visit 10 due to move to another country.

<sup>6</sup> Subject 1047 (O) (4 implants) did not come to Visit 12 but completed Visit 13.

Subject 2014 (O) (3 implants) withdrawn after Visit 11 due to AE (cancer).

Subject 2022 (O) (2 implants) not willing to continue study participation after Visit 11.

Subject 4002 (O) (2 implants) withdrawn after Visit 11 due to getting a dementia illness, lives in a home for elderly people. Immobilized.

<sup>7</sup> Subject 2005 (C) (2 implants) did not come to Visits 8 & 9 but completed Visit 10.

<sup>8</sup> Subject 1006 (C) (2 implants) did not come to Visit 11 but completed Visit 12 and Visit 13.

Subject 2005 (C) (2 implants) not willing to continue study participation after Visit 10.

Subject 4026 (C) (2 implants) did not come to Visits 11 & 12 but completed Visit 13.

<sup>9</sup> Subject 1017 (C) (4 implants) did not come to Visit 12 but completed Visit 13.

Subject 1025 (C) (5 implants) did not come to Visit 12 but completed Visit 13.

<sup>10</sup> Subject 1023 (C) (4 implants) not willing to continue study participation after Visit 12.

Appendix Figure:  
Cumulative distribution curve on Clinical Attachment Level changes (in mm) from loading to 5-  
years post loading, implant level.

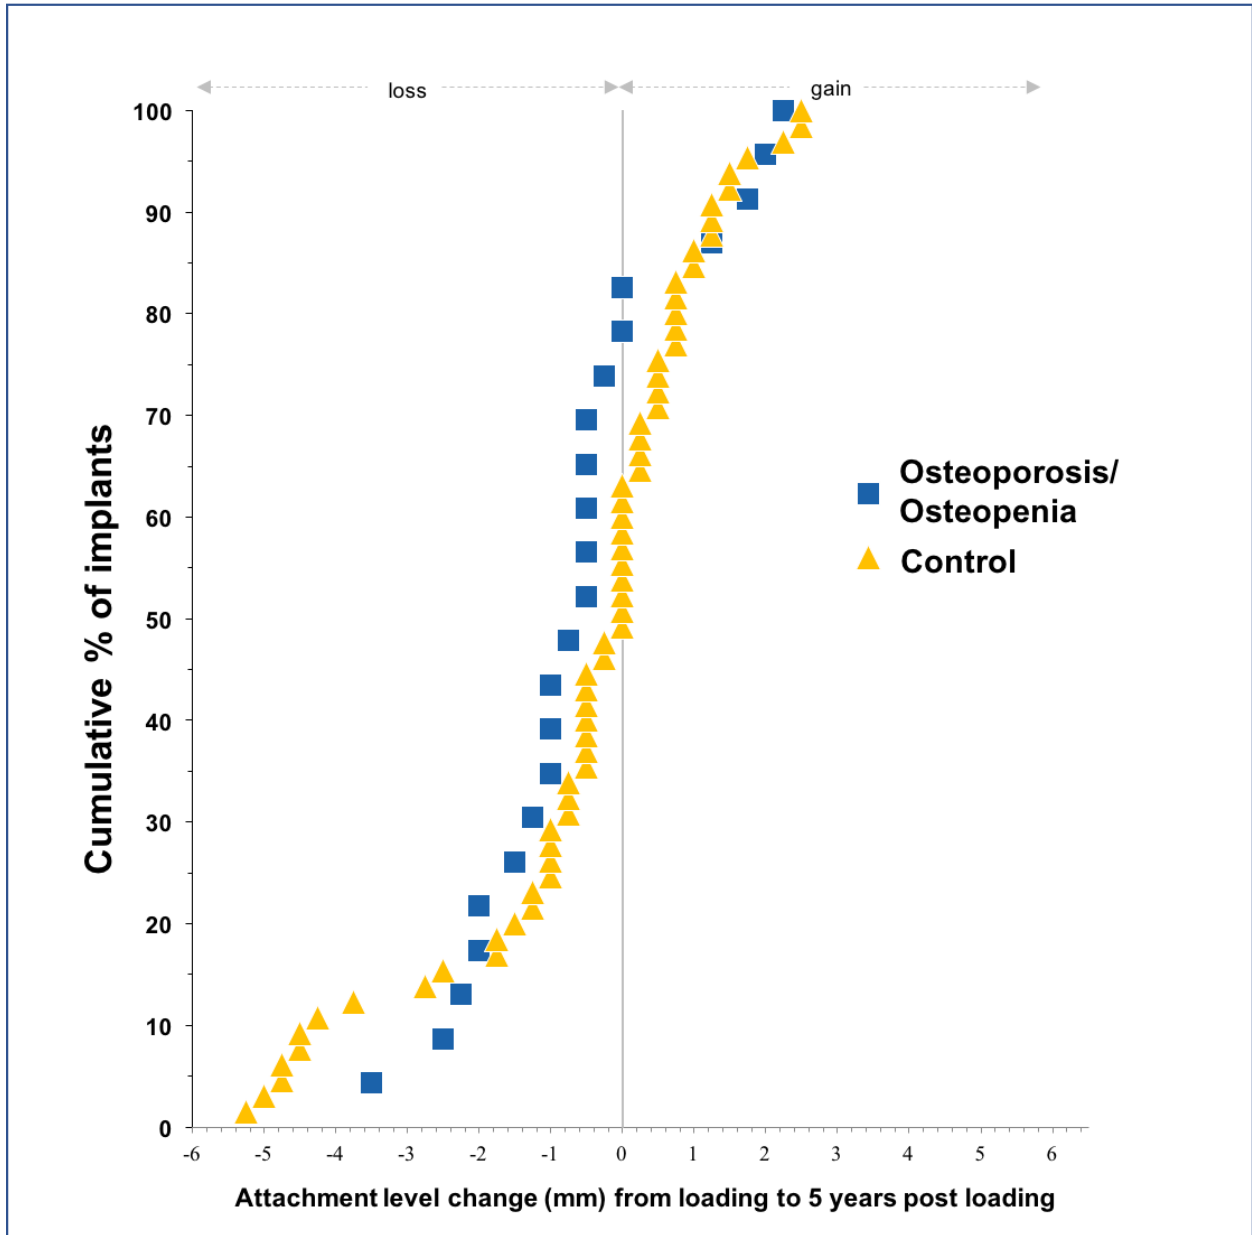

Supplement: Supplementary file 1 [file 13013285]
